# Supplementary material for: Quantitative Assessment of rPM6 for Fluorine- and Chlorine-Containing Metal Complexes: Comparison with Experimental, First-Principles, and Other Semiempirical Results
Source: MDPI journal article supplement (doi:10.3390/molecules23123332), 2018-12-15
Supplement: s1 [file s1]

## Supplementary Materials

# Quantitative Assessment of rPM6 for fluorine- and chlorine-containing metal complexes: Comparison with experimental, first-principles, and other semiempirical results

Toru Saito \*, Manami Fujiwara and Yu Takano

Graduate School of Information Sciences, Hiroshima City University, 3-4-1 Ozuka-Higashi,  
Asa-Minami-Ku, Hiroshima 731-3194; tsaito@hiroshima-cu.ac.jp (T.S.);  
fujiwara@bio.info.hiroshima-cu.ac.jp (M.F.); ytakano@hiroshima-cu.ac.jp (Y.T.)

\* Correspondence: tsaito@hiroshima-cu.ac.jp; Tel.: +81-82-830-1617

**Table S1.** Compounds with (charge, spin multiplicity), used in training sets **1** and **2** for fluorine and chlorine.

| F                                      |        | Cl                                                       |         |
|----------------------------------------|--------|----------------------------------------------------------|---------|
| CH <sub>2</sub> F <sub>2</sub>         | (0, 1) | CH <sub>3</sub> Cl                                       | (0, 1)  |
| CH <sub>2</sub> NH <sub>2</sub> F      | (0, 1) | CH <sub>2</sub> Cl <sub>2</sub>                          | (0, 1)  |
| CH <sub>2</sub> OHF                    | (0, 1) | CH <sub>2</sub> ClF                                      | (0, 1)  |
| CH <sub>3</sub> COF                    | (0, 1) | CH <sub>2</sub> NH <sub>2</sub> Cl                       | (0, 1)  |
| CHF <sub>3</sub>                       | (0, 1) | CH <sub>2</sub> OHCl                                     | (0, 1)  |
| FO                                     | (0, 2) | CH <sub>3</sub> COCl                                     | (0, 1)  |
| FOF                                    | (0, 1) | CHCl <sub>3</sub>                                        | (0, 1)  |
| FOH                                    | (0, 1) | Cl <sub>2</sub> O                                        | (-1, 1) |
| FOO                                    | (0, 2) | HClO <sub>4</sub>                                        | (0, 1)  |
| FOOF                                   | (0, 1) | HOCl                                                     | (0, 1)  |
| NH <sub>3</sub> F                      | (1, 1) | NCl <sub>3</sub>                                         | (0, 1)  |
| N <sub>2</sub> F                       | (1, 1) | NH <sub>2</sub> Cl                                       | (0, 1)  |
| C <sub>6</sub> H <sub>5</sub> F        | (0, 1) | NHCl <sub>2</sub>                                        | (0, 1)  |
| Mn(IV)(Por)F <sub>2</sub> <sup>a</sup> | (0, 4) | NOCl                                                     | (0, 1)  |
| Fe(III)(cyclamacetate) F <sup>b</sup>  | (1, 2) | C <sub>6</sub> H <sub>5</sub> Cl                         | (0, 1)  |
|                                        |        | Mn(II)(tpa)Cl <sub>2</sub> <sup>c</sup>                  | (0, 6)  |
|                                        |        | Fe(IV)=O(TMC)Cl <sup>d</sup>                             | (1, 5)  |
|                                        |        | Fe(III)(Py <sub>2</sub> TTA)Cl <sub>2</sub> <sup>e</sup> | (0, 6)  |

<sup>a</sup> See Fig. S1 (a)

<sup>b</sup> See Fig. S1 (b)

<sup>c</sup> tpa = tris-2-picolyamine, see Fig. S1 (c)

<sup>d</sup> TMC = 1,4,8,11-tetramethyl-1,4,8,11-tetraazacyclotetradecane

<sup>e</sup> Py<sub>2</sub>TTA = 3,5-bis(2-pyridyl)-1,2,4,6-thiadiazine

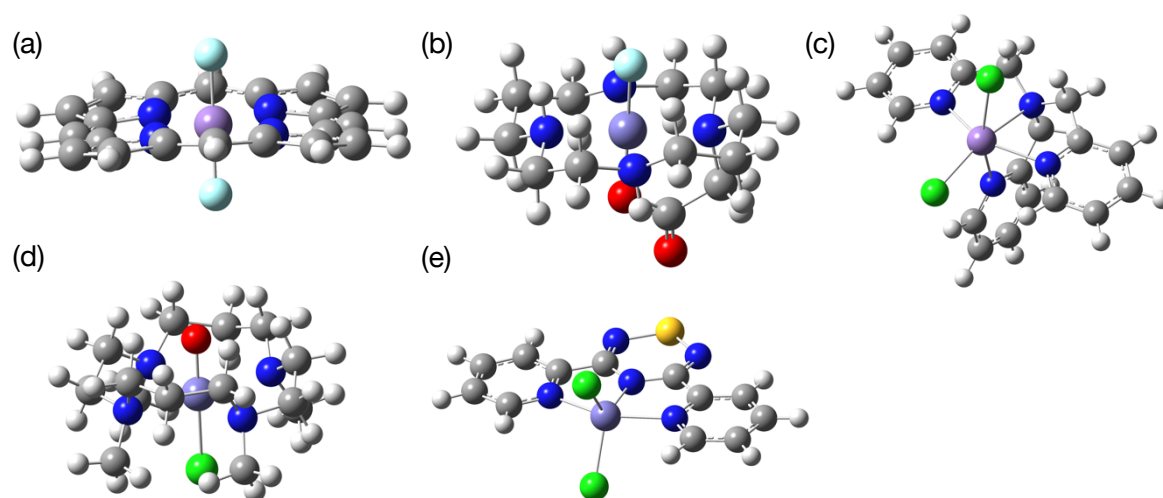

**Figure S1.** Illustration of the Mn and Fe complexes in Table S1.

**Table S2.** List of names used in the test set to evaluate the performance on magnetic interactions.

| System |                                                                                                                                              |
|--------|----------------------------------------------------------------------------------------------------------------------------------------------|
| FEBKOM | bis( $\mu$ 2-oxo)-bis(bis(1,10-phenanthroline- <i>N,N'</i> )-Mn(IV))                                                                         |
| FEBKUS | bis( $\mu$ 2-oxo)-bis(bis(1,10-phenanthroline- <i>N,N'</i> ))-Mn(III)Mn(IV)                                                                  |
| HUYGAJ | bis(( $\mu$ 2-acetato)-bis( $\mu$ 2-oxo)-bis(2,2'-bipyridyl)-dichloro-di-Mn(IV))                                                             |
| GAVWIJ | ( $\mu$ 2-acetato- <i>O,O'</i> )-bis( $\mu$ 2-oxo)-dichloro-bis(2,2'-bipyridine- <i>N,N'</i> )-Mn(III)Mn(IV)                                 |
| TIPFED | ( $\mu$ 2-hydroxo)-bis( $\mu$ 2-pivalato- <i>O,O'</i> )-bis(1,4,7-trimethyl-1,4,7-triazacyclononane)-Mn(II)Mn(III)                           |
| VEGTEG | ( $\mu$ 2-hydroxo)-bis(( $\mu$ 2-acetato- <i>O,O'</i> )-(N,N',N"-trimethyl-1,4,7-triazacyclononane- <i>N,N',N''</i> )-di-Mn(II))             |
| KEJWIG | ( $\mu$ 2-2,6-bis((2-(2-pyridyl)ethyl)(2-pyridylmethyl)aminomethyl)-4-methylphenolato)-bis( $\mu$ 2-acetato)-Mn(II)Mn(III)                   |
| ILELEQ | bis( $\mu$ 2-acetato)-( $\mu$ 2-2,6-bis(bis(2-pyridylmethyl)aminomethyl)-4-nitrophenolato)-di-Mn(II)                                         |
| PIZWIG | ( $\mu$ 2-fluoro)-tetrafluoro-bis(1,4,7-trimethyl-1,4,7-triazonane)-di-Mn(III)                                                               |
| EDEWIV | ( $\mu$ 2-fluoro)-bis( $\mu$ 2-1,3-bis[bis(3,5-dimethyl-1-pyrazolyl)-methyl]benzene)-di-Mn(II)                                               |
| CULSOR | ( $\mu$ 2-oxo)-bis( $\mu$ 2-acetato- <i>O,O'</i> )-bis(1,4,7-triazacyclononane- <i>N',N'',N'''</i> )-di-Mn(III)                              |
| ARUGOK | bis( $\mu$ 2-2-chlorobenzoato)-( $\mu$ 2-oxo)-bis(1,10-phenanthroline)-diaqua-di-Mn(iii)                                                     |
| ARUGUQ | bis( $\mu$ 2-2-chlorobenzoato)-( $\mu$ 2-oxo)-bis(1,10-phenanthroline)-diaqua-di-Mn(iii)                                                     |
| BARFOQ | bis( $\mu$ 2- <i>N</i> -methyl- <i>N'</i> -carboxymethyl- <i>N,N'</i> -bis(2-pyridylmethyl)ethane-1,2-diamine)-diaqua-di-Mn(II)              |
| KASPEC | bis( $\mu$ -(1,1'-((3-(bis(3,5-dimethyl-1H-pyrazol-1-yl)methyl)phenyl)methylene)bis(3,5-dimethyl-1H-pyrazole)))-( $\mu$ -chloro)-di-Fe(II)   |
| EDEVAM | ( $\mu$ 2-fluoro)-bis( $\mu$ 2-1,3-bis[bis(3,5-dimethyl-1-pyrazolyl)-methyl]benzene)-di-Fe(II)                                               |
| UCANAP | bis( $\mu$ 2-hydroxo)-tetrakis(bis(1-methylimidazol-2-yl) ketone)-di-Fe(III)                                                                 |
| CEPBEF | ( $\mu$ 2-hydroxo)-bis(4-azaheptane-1,7-bis(salicylideneiminate))-di-Fe(III)                                                                 |
| YOCKAC | bis(( $\mu$ 2-oxo)-(tris((6-methylpyrid-2-yl)methyl)amine- <i>N,N',N''</i> )-Fe(III))                                                        |
| RINXUJ | bis( $\mu$ 2-(2-(((2-(oxy)-3-((2-(oxy)-3-methoxybenzylidene)amino)propyl)imino)methyl)-6-ethoxyphenolato))-di-Fe(III)                        |
| KEYXOC | ( $\mu$ 2-oxo)-difluoro-bis(tris(2-pyridylmethyl)amine)-di-Fe(III)                                                                           |
| QEZHN  | ( $\mu$ 2-oxo)-bis(2,4,6-tris(2-pyridyl)-1,3,5-triazine- <i>N,N',N''</i> )-bis(dicyanamide- <i>N</i> )-bis(nitrato- <i>O,O'</i> )-di-Fe(III) |
| RITHAD | ( $\mu$ 2-Acetato- <i>O,O'</i> )-bis( $\mu$ 2-methoxo)-bis((2-oxybenzyl)-(2-(imidazol-2-yl)ethyl)amine- <i>N,N',O</i> )-di-Fe(III)           |
| GUQMUA | ( $\mu$ 2-oxo)-bis( $\mu$ 2-triphenylethanolato)-bis(1,4,7-trimethyl-1,4,7-triazacyclononane)-Fe(II)Fe(III)                                  |

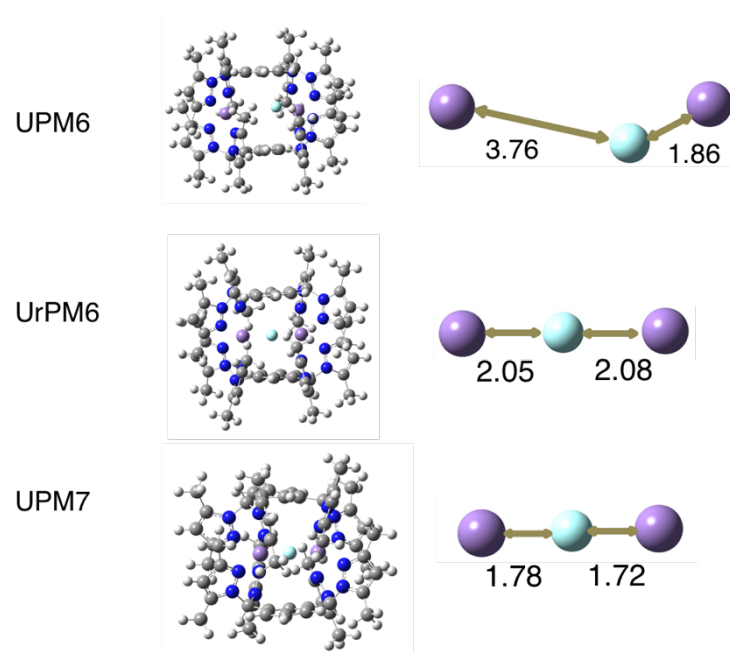

**Figure S2.** Illustration of local minima for EDEVIW optimized by UPM6, UrPM6 and UPM7

**Table S3.** Spin density distributions for stationary points obtained at the UB3LYP/SVP, UPM6, UrPM6, and UPM7 levels of theory.

| Species                            | Method | $\rho_{\text{Mn}}$ | $\rho_{\text{O}}$ | $\rho_{\text{Sub}}$ | $\rho_{\text{rest}}$ |
|------------------------------------|--------|--------------------|-------------------|---------------------|----------------------|
| <b><sup>3</sup>TS1<sub>a</sub></b> | UB3LYP | 2.90               | −0.64             | −0.23               | −0.03                |
|                                    | UPM6   | 2.42               | −0.25             | −0.18               | 0.01                 |
|                                    | UrPM6  | 1.06               | 0.79              | 0.21                | −0.06                |
|                                    | UPM7   | 1.08               | 0.62              | 0.33                | −0.03                |
| <b><sup>3</sup>I<sub>a</sub></b>   | UB3LYP | 2.98               | 0.04              | −0.99               | −0.03                |
|                                    | UPM6   | 1.02               | −0.05             | 1.01                | 0.02                 |
|                                    | UrPM6  | 1.10               | −0.13             | 1.02                | 0.01                 |
|                                    | UPM7   | 0.99               | −0.06             | 1.02                | −0.05                |
| <b><sup>3</sup>TS<sub>a</sub></b>  | UB3LYP | 2.48               | 0.12              | −0.54               | −0.06                |
|                                    | UPM6   | N.A.               | N.A.              | N.A.                | N.A.                 |
|                                    | UrPM6  | 1.44               | 0.03              | 0.59                | −0.06                |
|                                    | UPM7   | N.A.               | N.A.              | N.A.                | N.A.                 |
| <b><sup>3</sup>P<sub>a</sub></b>   | UB3LYP | 1.94               | −0.01             | 0.00                | 0.07                 |
|                                    | UPM6   | 2.95               | −0.02             | 0.02                | −0.95                |
|                                    | UrPM6  | 2.01               | −0.02             | 0.01                | 0.00                 |
|                                    | UPM7   | 2.02               | −0.01             | 0.01                | −0.02                |
| <b><sup>3</sup>TS1<sub>b</sub></b> | UB3LYP | 2.84               | −0.54             | −0.31               | 0.01                 |
|                                    | UPM6   | N.A.               | N.A.              | N.A.                | N.A.                 |
|                                    | UrPM6  | 1.10               | 0.54              | 0.42                | −0.06                |
|                                    | UPM7   | 0.91               | 0.66              | 0.34                | 0.09                 |
| <b><sup>5</sup>I<sub>b</sub></b>   | UB3LYP | 2.93               | 0.04              | 1.00                | 0.03                 |
|                                    | UPM6   | 3.00               | −0.01             | 1.00                | 0.01                 |
|                                    | UrPM6  | 3.08               | 0.00              | 1.00                | −0.08                |
|                                    | UPM7   | 2.81               | 0.04              | 1.00                | 0.15                 |
| <b><sup>5</sup>TS2<sub>b</sub></b> | UB3LYP | 3.42               | 0.10              | 0.60                | −0.12                |
|                                    | UPM6   | 3.33               | 0.08              | 0.56                | 0.03                 |
|                                    | UrPM6  | 3.32               | 0.11              | 0.68                | −0.11                |
|                                    | UPM7   | N.A.               | N.A.              | N.A.                | N.A.                 |

N.A.: not available.
